# Supplementary material
Source: MDPI journal article supplement (https://www.mdpi.com/1999-4907/13/9/1436)
Supplement: s1 [file s1]

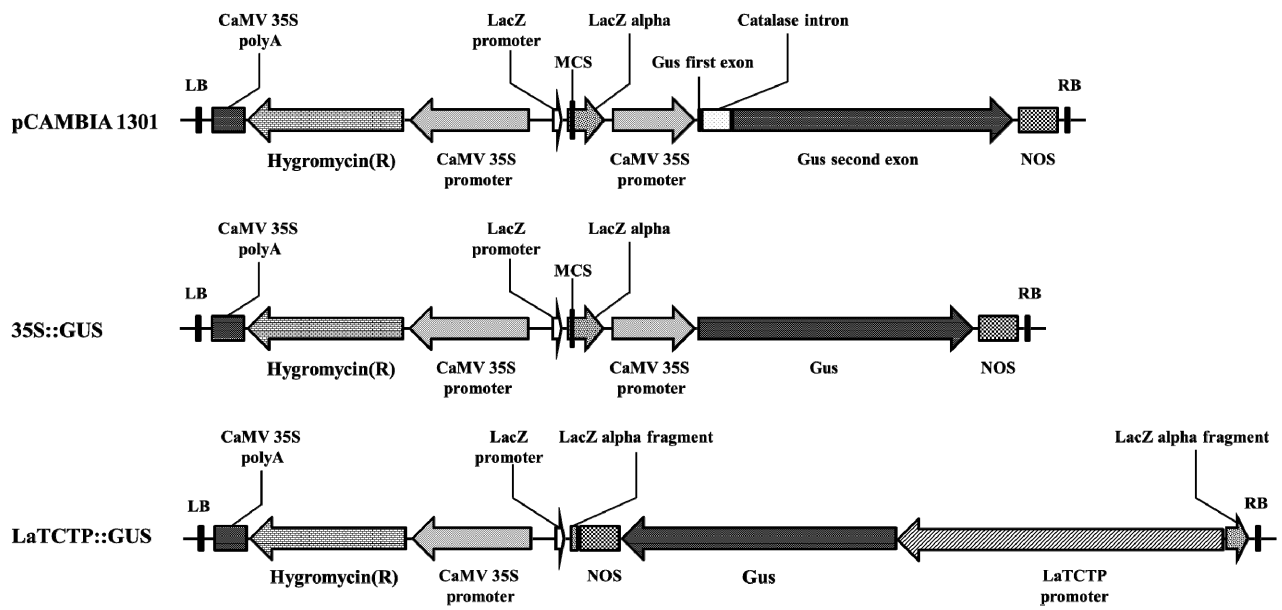

**Figure S1.** Physical map of T-DNA region of the binary plasmids pCambia1301, 35S::GUS and pLaTCTP::GUS used for genetic transformation of *Larix kaempferi*. LB, left border; RB, right border.

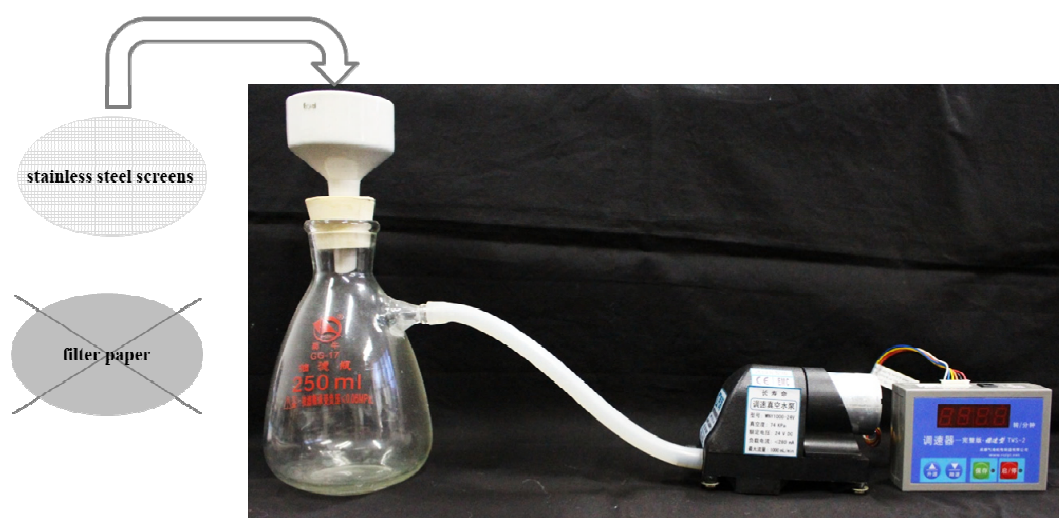

**Figure S2.** Schematic diagram of the improved vacuum filter. It consists of a Buchner funnel with 400 mesh stainless steel screens instead of filter paper and a micro vacuum pump.

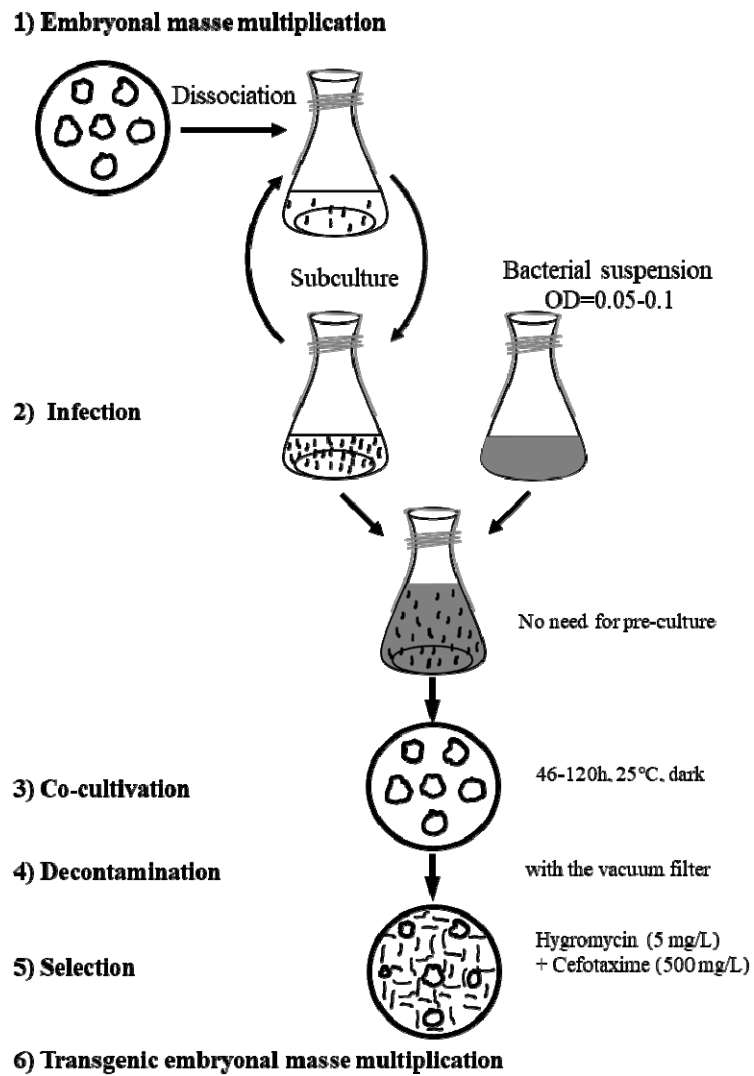

**Figure S3.** Principle of the simplified protocol for genetic transformation of *Larix kaempferi*.

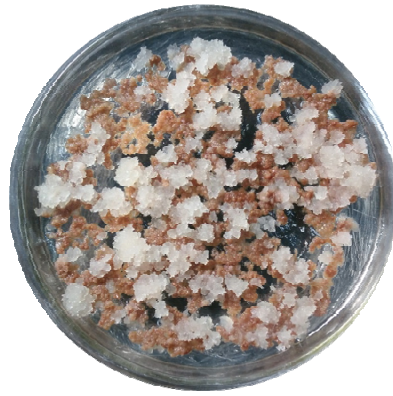

**Figure S4.** Development of hygromycin-resistant embryonal masses derived from line S287 co-cultivated with *A. tumefaciens* GV3101 harboring the binary vector pCAMBIA1301 on selective medium (supplemented with hygromycin 5mg/L) after 60 day of culture. The brown tissue is the dead embryonic cell after selecting.

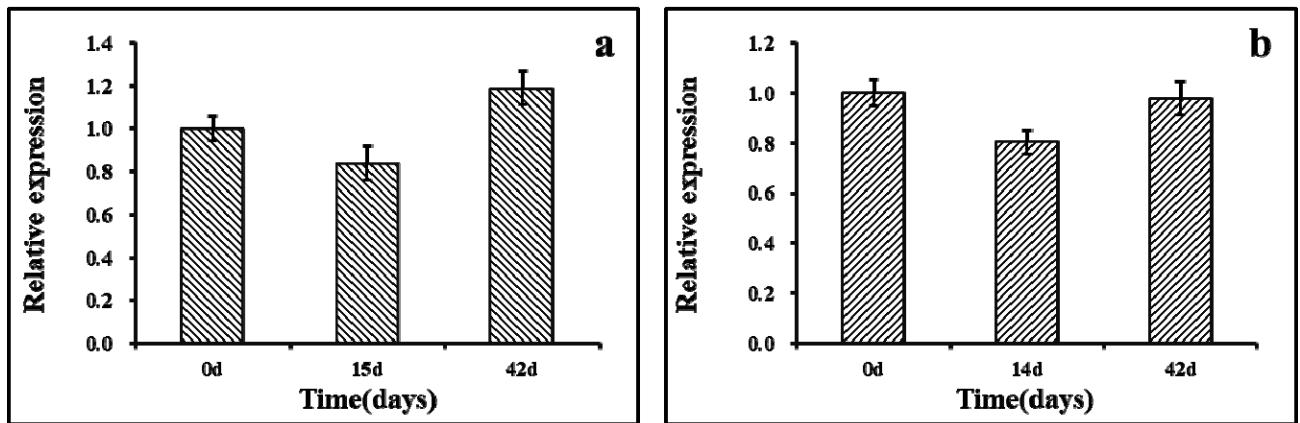

**Figure S5.** Accumulation of *GUS* transcripts at different developmental stages of somatic embryos from transgenic cell lines P2 (a) and P5 (b).

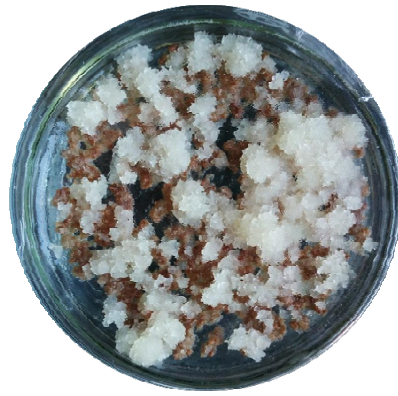

**Figure S6.** Development of hygromycin-resistant embryonal masses derived from line S287 co-cultivated with *A. tumefaciens* GV3101 harboring the binary vector 35S::GUS on selective medium (supplemented with hygromycin 5mg/L) after 60 day of culture. The brown tissue is the dead embryonic cell after selecting.

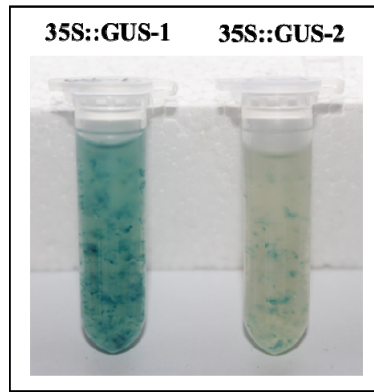

**Figure S7.** Histochemical staining for GUS activity in transgenic lines 35S::GUS-1 and 35S::GUS-2.

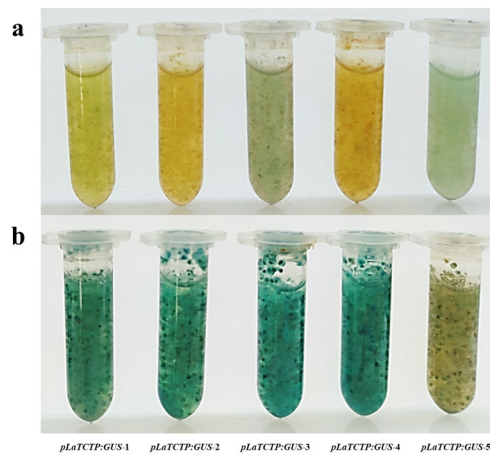

**Figure S8.** GUS staining in the transgenic lines *pLaTCTP::GUS*. **(a)** Embryogenic tissues, **(b)** Early embryos cultured for 15 days.
